# Supplementary material for: A susceptibility-based rainfall threshold approach for landslideoccurrence
Source: Copernicus journal article supplement (doi:10.5194/nhess-2018-316), 2018-11-06
Supplement: Supplementary file 1 [file nhess-2018-316-supplement.zip]

Archive with 2 entries (2 files):
- SupplementaryMaterial1_DailyRainfallDistributions.pdf
- SupplementaryMaterial2_R-code_ARSthreshold.R
