# Supplementary material for: A susceptibility-based rainfall threshold approach for landslideoccurrence
Source: Copernicus journal article supplement (doi:10.5194/nhess-2018-316), 2018-11-06

**Supplementary material 1. Box and whisker plot for daily TMPA-RT data from 1998-2018 per month: a vertical line goes through the box at the median; the lower and upper hinges correspond to the first and third quartiles; the upper (lower) whisker extend from the hinges to the largest (smallest) value no further than 1.5 times the interquartile range; data beyond the end of the whiskers are outliers, presented as individual points.**

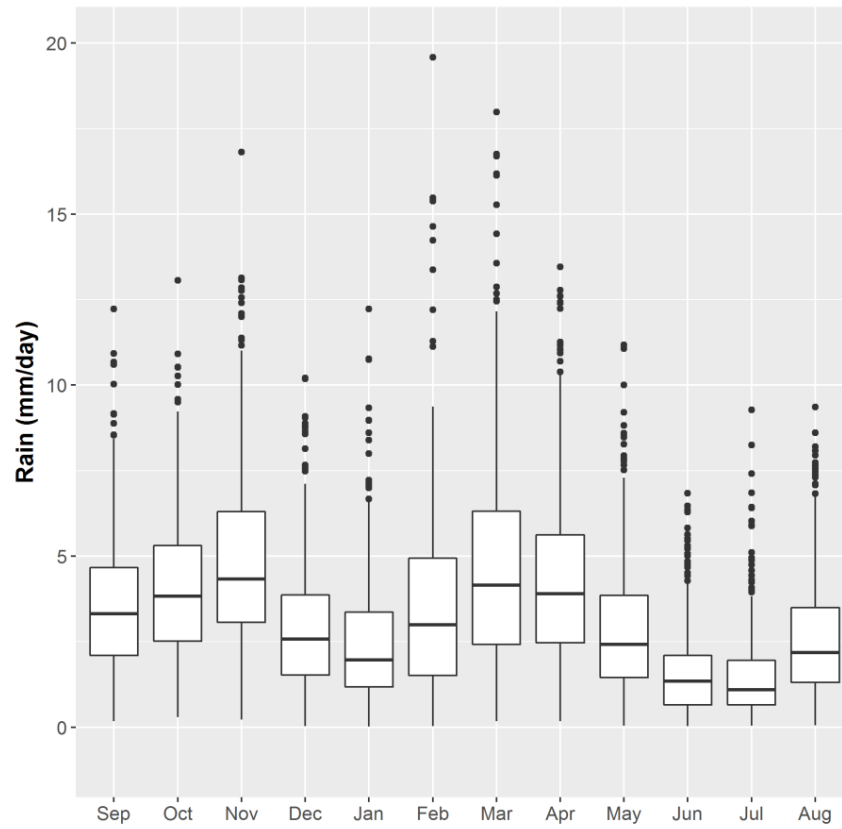

Supplement: Supplementary file 1 [file nhess-2018-316-supplement.zip › SupplementaryMaterial1_DailyRainfallDistributions.pdf]
